# Supplementary material for: Construction of a tandem HZSM-5 with CuZnAl catalyst for alkylation of benzene with syngas
Source: Royal Society of Chemistry journal article supplement (doi:10.1039/c9nj05273a), 2020-01-01
Supplement: c9nj05273a1.pdf [file c9nj05273a1.pdf]

Supporting Information

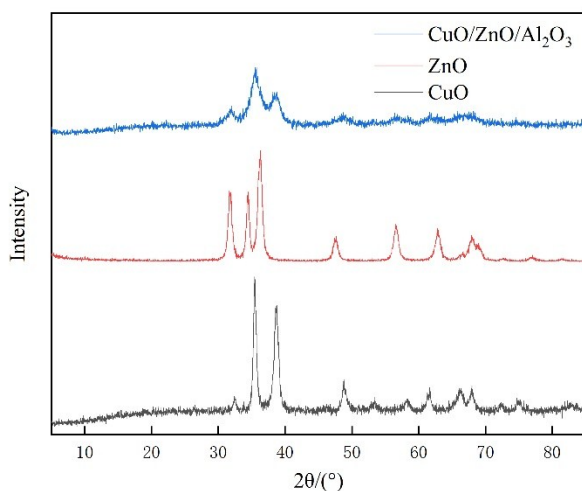

**Fig.S1** XRD spectra of CuO, ZnO and CuO/ZnO/Al<sub>2</sub>O<sub>3</sub>

**Table.S1** catalytic performance of only Cu/ZnO/Al<sub>2</sub>O<sub>3</sub> and only ZSM-5 on alkylation of benzene

| Samples                                                | Syngas and benzene reaction  |                               | Methanol and benzene reaction |
|--------------------------------------------------------|------------------------------|-------------------------------|-------------------------------|
|                                                        | Whether to generate methanol | Whether to generate aromatics | Whether to generate aromatics |
| Only ZSM-5                                             | No                           | No                            | Yes                           |
| Only Cu/ZnO/Al <sub>2</sub> O <sub>3</sub>             | Yes                          | No                            | No                            |
| Cu/ZnO/Al <sub>2</sub> O <sub>3</sub> and ZSM-5 mixing | No                           | Yes                           | Yes                           |
